# Supplementary material for: Infoveillance of infectious diseases in USA: STDs, tuberculosis, and hepatitis
Source: Springer Nature journal article supplement (doi:10.1186/s40537-018-0140-9), 2018-09-06
Supplement: 40537_2018_140_MOESM1_ESM.pdf [file 40537_2018_140_MOESM1_ESM.pdf]

# **Additional File**

**for**

## ***“Infoveillance of Infectious Diseases in USA: STDs, Tuberculosis, and Hepatitis”***

***Amaryllis Mavragani\* and Gabriela Ochoa***

***Department of Computing Science and Mathematics, Faculty of Natural Sciences,  
University of Stirling***

\*Corresponding Author: Amaryllis Mavragani, e-mail: [amaryllis.mavragani1@stir.ac.uk](mailto:amaryllis.mavragani1@stir.ac.uk);  
Address: Department of Computing Science and Mathematics, Faculty of Natural Sciences,  
University of Stirling, Stirling, FK9 4LA, UK

Gabriela Ochoa: e-mail: [gabriela.ochoa@cs.stir.ac.uk](mailto:gabriela.ochoa@cs.stir.ac.uk); Department of Computing Science and  
Mathematics, Faculty of Natural Sciences, University of Stirling, Stirling, FK9 4LA, UK

Tables S1&S2, S3&S4, and S5&S6 consist of the rankings and scorings of the 50 States (plus DC) by year from 2004 to 2017 for the terms ‘Chlamydia’, ‘Gonorrhea’, and ‘Syphilis’, respectively.

**Table S1.** Rankings and Scorings for the term ‘Chlamydia’ by State by year from 2004 to 2010.

| 2004                | 2005                | 2006                | 2007                | 2008                | 2009                | 2010                |
|---------------------|---------------------|---------------------|---------------------|---------------------|---------------------|---------------------|
| North Dakota (100)  | Alaska (100)        | Wyoming (100)       | Arkansas (100)      | West Virginia (100) | Alaska (100)        | Louisiana (100)     |
| Arkansas (96)       | Mississippi (97)    | Hawaii (93)         | Alabama (96)        | Wyoming (77)        | Delaware (97)       | South Dakota (87)   |
| Mississippi (44)    | West Virginia (94)  | New Mexico (87)     | South Carolina (92) | Mississippi (69)    | New Hampshire (95)  | North Carolina (87) |
| Rhode Island (42)   | Arkansas (92)       | Kentucky (81)       | Louisiana (90)      | South Carolina (68) | South Carolina (95) | Alabama (85)        |
| Louisiana (41)      | North Dakota (91)   | Kansas (79)         | West Virginia (87)  | Delaware (68)       | Alabama (89)        | Vermont (83)        |
| Oregon (34)         | Iowa (91)           | Maine (78)          | Kentucky (86)       | New Mexico (66)     | Tennessee (88)      | Mississippi (83)    |
| Maryland (33)       | South Dakota (80)   | Louisiana (76)      | Alaska (85)         | Pennsylvania (64)   | Iowa (87)           | South Carolina (83) |
| Wyoming (33)        | Montana (80)        | Pennsylvania (75)   | North Dakota (84)   | Louisiana (64)      | Indiana (86)        | Indiana (79)        |
| South Carolina (33) | Hawaii (77)         | Iowa (74)           | Kansas (83)         | Vermont (63)        | Mississippi (83)    | Alaska (78)         |
| Delaware (32)       | South Carolina (71) | Indiana (72)        | Mississippi (82)    | Arkansas (63)       | North Dakota (82)   | Florida (77)        |
| Washington (32)     | Nebraska (71)       | Oklahoma (68)       | Connecticut (80)    | Hawaii (62)         | South Dakota (82)   | Delaware (76)       |
| Nevada (31)         | Louisiana (67)      | Mississippi (66)    | Nebraska (77)       | Kansas (61)         | New Jersey (81)     | Georgia (75)        |
| New Mexico (31)     | Connecticut(65)     | Nebraska (66)       | Iowa (77)           | Rhode Island (61)   | Louisiana (81)      | Pennsylvania (74)   |
| Pennsylvania (31)   | New Hampshire (64)  | Oregon (65)         | Oklahoma (77)       | Iowa (60)           | Idaho (81)          | Rhode Island (72)   |
| Hawaii (31)         | Missouri (64)       | Michigan (63)       | Arizona (76)        | Georgia (59)        | Rhode Island (81)   | New Hampshire (72)  |
| Missouri (28)       | North Carolina (61) | New Jersey (62)     | Wyoming (75)        | Florida (59)        | Georgia (79)        | Nevada (72)         |
| Minnesota (28)      | Oregon (59)         | Montana (62)        | Hawaii (73)         | Wisconsin (59)      | Kentucky (78)       | Kansas (71)         |
| West Virginia (28)  | Minnesota (59)      | Vermont (62)        | Georgia (73)        | Oklahoma (58)       | Arkansas (78)       | New Mexico (71)     |
| Ohio (28)           | Kansas (58)         | South Carolina (62) | Indiana (72)        | New York (57)       | Utah (78)           | New York (69)       |
| Indiana (27)        | Wisconsin (58)      | Maryland (61)       | Oregon (72)         | Maryland (56)       | Texas (78)          | Ohio (69)           |
| South Dakota (26)   | Indiana (57)        | New York (61)       | Wisconsin (71)      | Kentucky (55)       | Maryland (77)       | Maryland (69)       |
| Massachusetts (26)  | Texas (55)          | Virginia (1)        | Michigan (71)       | South Dakota (55)   | Arizona (77)        | Arizona (69)        |
| New Jersey (26)     | Florida (54)        | Massachusetts (60)  | Maryland (70)       | North Carolina (55) | Massachusetts (77)  | Tennessee (69)      |
| Kansas (25)         | Maine (54)          | Ohio (60)           | Florida (69)        | Michigan (55)       | Kansas (77)         | Colorado (68)       |
| Vermont (25)        | Georgia (53)        | Wisconsin (59)      | Vermont (69)        | Alabama (54)        | Oregon (77)         | Wisconsin (68)      |
| Texas (25)          | Alabama (52)        | Georgia (58)        | Pennsylvania (68)   | Oregon (54)         | North Carolina (77) | Iowa (67)           |
| New York (25)       | Pennsylvania (52)   | Illinois (58)       | Tennessee (68)      | Indiana (54)        | Ohio (76)           | Michigan (66)       |
| Georgia (24)        | DC (52)             | Texas (58)          | Texas (68)          | North Dakota (53)   | Hawaii (75)         | Nebraska (65)       |
| New Hampshire (24)  | New York (51)       | New Hampshire (57)  | New York (68)       | Minnesota (53)      | Florida (75)        | Maine (65)          |
| Michigan (24)       | Tennessee (51)      | Alabama (57)        | Missouri (67)       | Missouri (52)       | Nebraska (75)       | Texas (64)          |
| California (24)     | Illinois (49)       | Florida (55)        | Illinois (67)       | Montana (49)        | Pennsylvania (74)   | Massachusetts (63)  |
| Florida (23)        | California (49)     | North Carolina (55) | Ohio (66)           | Tennessee (49)      | Illinois (73)       | Idaho (62)          |
| Colorado (23)       | Ohio (46)           | Alaska (55)         | Maine (66)          | Maine (48)          | Connecticut (72)    | DC (62)             |
| Wisconsin (23)      | Arizona(46)         | Tennessee (54)      | Minnesota (64)      | Washington (47)     | New York (72)       | Missouri (61)       |
| Illinois (23)       | Nevada (46)         | Rhode Island (52)   | North Carolina (63) | Texas (47)          | Michigan (72)       | New Jersey (61)     |
| Connecticut (22)    | New Mexico (45)     | DC (51)             | Montana (62)        | New Jersey (46)     | Missouri (72)       | Kentucky (61)       |
| Iowa (22)           | Colorado (43)       | California (50)     | California (60)     | Alaska (45)         | Oklahoma (70)       | Arkansas (60)       |
| Virginia (22)       | Michigan (42)       | Utah (50)           | Delaware (60)       | Ohio (45)           | New Mexico (69)     | Illinois (60)       |
| Nebraska (21)       | Virginia (41)       | Washington (49)     | DC (57)             | Nebraska (43)       | West Virginia (67)  | Washington (59)     |
| Arizona (20)        | New Jersey (40)     | Arizona (49)        | Massachusetts (55)  | New Hampshire (43)  | Montana (67)        | Wyoming (57)        |
| Oklahoma (20)       | Massachusetts (40)  | Minnesota (49)      | Colorado (55)       | DC (43)             | Minnesota (66)      | Oregon (57)         |
| North Carolina (18) | Rhode Island (38)   | Missouri (49)       | New Jersey (54)     | Massachusetts (43)  | Wisconsin (66)      | Minnesota (57)      |
| Alaska (18)         | Idaho (36)          | Colorado (48)       | Virginia (54)       | California (41)     | DC (66)             | Hawaii (54)         |
| DC (17)             | Kentucky (36)       | Idaho (48)          | Idaho (53)          | Virginia (40)       | Washington (64)     | Connecticut (54)    |
| Utah (16)           | Maryland (31)       | South Dakota (48)   | Utah (50)           | Arizona (39)        | Maine (60)          | North Dakota (53)   |
| Maine (15)          | Oklahoma (29)       | Connecticut (47)    | New Mexico (49)     | Utah (39)           | Nevada (59)         | Oklahoma (50)       |
| Tennessee (14)      | Washington (28)     | Delaware (45)       | Washington (46)     | Connecticut (39)    | Colorado (55)       | Montana (49)        |
| Idaho (14)          | Delaware (27)       | North Dakota (44)   | Rhode Island (46)   | Nevada (39)         | Wyoming (50)        | West Virginia (48)  |
| Montana (11)        | Utah (26)           | West Virginia (43)  | Nevada (42)         | Illinois (37)       | California (49)     | Utah (45)           |
| Alabama (6)         | Wyoming (20)        | Nevada (34)         | New Hampshire (42)  | Idaho (36)          | Vermont (41)        | Virginia (43)       |
| Kentucky (4)        | Vermont (20)        | Arkansas (33)       | South Dakota (40)   | Colorado (33)       | Virginia (41)       | California (39)     |

**Table S2. Rankings and Scorings for the term ‘Chlamydia’ by State by year from 2011 to 2017.**

| 2011                | 2012                | 2013                | 2014                | 2015                | 2016                | 2017                |
|---------------------|---------------------|---------------------|---------------------|---------------------|---------------------|---------------------|
| Mississippi (100)   | Mississippi (100)   | Mississippi (100)   | Mississippi (100)   | Mississippi (100)   | Mississippi (100)   | Mississippi (100)   |
| Georgia (79)        | Louisiana (97)      | Louisiana (82)      | Louisiana (86)      | Louisiana (94)      | Louisiana (88)      | Louisiana (82)      |
| Texas (76)          | DC (93)             | Georgia (75)        | Georgia (86)        | Georgia (93)        | Arkansas (84)       | Arkansas (78)       |
| Wyoming (75)        | Georgia (84)        | Missouri (70)       | Oklahoma (75)       | DC (90)             | DC (79)             | South Carolina (75) |
| Alaska (73)         | Texas (78)          | Texas (69)          | South Carolina (74) | South Carolina (90) | Georgia (78)        | Georgia (74)        |
| DC (72)             | Illinois (77)       | Alabama (68)        | Wyoming (71)        | Alaska (89)         | Alabama (77)        | Alabama (73)        |
| Rhode Island (71)   | Alabama (74)        | DC (67)             | Missouri (70)       | South Dakota (87)   | North Dakota (76)   | Indiana (71)        |
| Louisiana (70)      | Alaska (72)         | Kentucky (67)       | Kentucky (70)       | Michigan (84)       | Michigan (75)       | North Dakota (71)   |
| New Mexico (66)     | Michigan (70)       | South Carolina (67) | Tennessee (70)      | Montana (84)        | South Carolina (71) | Tennessee (69)      |
| Indiana (65)        | West Virginia (69)  | Tennessee (65)      | Hawaii (69)         | Texas (82)          | New Mexico (70)     | Delaware (67)       |
| New York (64)       | North Carolina (68) | Nevada (64)         | DC (69)             | Illinois (81)       | North Carolina (69) | Oklahoma (66)       |
| Montana (64)        | Florida (66)        | Illinois (64)       | New Mexico (68)     | Tennessee (80)      | West Virginia (69)  | New Mexico (66)     |
| North Carolina (64) | New Mexico (66)     | Oklahoma (64)       | Texas (68)          | Arkansas (80)       | Texas (69)          | North Carolina (66) |
| West Virginia (64)  | Missouri (66)       | Arkansas (63)       | Kansas (67)         | North Carolina (79) | Tennessee (68)      | Kentucky (65)       |
| Florida (64)        | South Carolina (65) | Indiana (63)        | North Carolina (66) | Alabama (77)        | Indiana (67)        | Missouri (65)       |
| Illinois (62)       | Montana (65)        | Florida (63)        | Nevada (66)         | Rhode Island (77)   | Missouri (66)       | Texas (65)          |
| Arizona (62)        | Kentucky (64)       | North Carolina (61) | Alaska (66)         | Florida (76)        | Illinois (65)       | Nevada (64)         |
| Nebraska (62)       | Arizona (64)        | Alaska (61)         | Michigan (65)       | Nebraska (74)       | Arizona (65)        | South Dakota (64)   |
| South Carolina (62) | Ohio (64)           | New Mexico (60)     | Alabama (65)        | Oklahoma (73)       | South Dakota (65)   | Arizona (63)        |
| Maryland (61)       | New York (63)       | Arizona (60)        | Illinois (64)       | Missouri (72)       | Kentucky (65)       | Michigan (63)       |
| North Dakota (61)   | South Dakota (63)   | Virginia (60)       | Arkansas (64)       | Hawaii (72)         | Pennsylvania (64)   | DC (63)             |
| Michigan (61)       | Indiana (62)        | Michigan (59)       | South Dakota (64)   | Kentucky (71)       | New York (64)       | Rhode Island (62)   |
| Hawaii (61)         | North Dakota (62)   | Kansas (59)         | Florida (64)        | New Mexico (71)     | Nevada (63)         | Alaska (62)         |
| Pennsylvania (61)   | Pennsylvania (62)   | Pennsylvania (58)   | West Virginia (62)  | Iowa (70)           | Oklahoma (63)       | Ohio (61)           |
| Ohio (60)           | Maryland (62)       | New York (58)       | Pennsylvania (60)   | New York (70)       | Ohio (63)           | Illinois (61)       |
| Kansas (59)         | Wisconsin (62)      | Maryland (58)       | New York (60)       | Nevada (69)         | Maryland (62)       | Florida (60)        |
| Tennessee (59)      | Massachusetts (61)  | Ohio (57)           | Massachusetts (60)  | Wyoming (69)        | Delaware (62)       | Maryland (60)       |
| South Dakota (59)   | Tennessee (61)      | Minnesota (57)      | Indiana (58)        | Delaware (69)       | Montana (62)        | Pennsylvania (60)   |
| Kentucky (58)       | Nebraska (60)       | Montana (57)        | Colorado (58)       | Arizona (68)        | Wyoming (61)        | West Virginia (60)  |
| Missouri (58)       | Maine (60)          | Delaware (56)       | Nebraska (57)       | West Virginia (67)  | Florida (61)        | Hawaii (60)         |
| Minnesota (56)      | California (60)     | Wyoming (56)        | Wisconsin (57)      | Colorado (67)       | Nebraska (60)       | New York (58)       |
| Wisconsin (56)      | Nevada (59)         | Wisconsin (56)      | North Dakota (56)   | California (66)     | Rhode Island (59)   | Iowa (57)           |
| California (55)     | Minnesota (59)      | Massachusetts (56)  | Ohio (56)           | Indiana (66)        | Iowa (58)           | Virginia (55)       |
| Massachusetts (55)  | Colorado (59)       | North Dakota (55)   | Arizona (56)        | North Dakota (65)   | Idaho (56)          | Montana (55)        |
| Colorado (55)       | Kansas (58)         | Nebraska (54)       | Maryland (55)       | Ohio (64)           | Kansas (56)         | Wyoming (54)        |
| Arkansas (55)       | Oklahoma (57)       | Washington (54)     | Iowa (55)           | Pennsylvania (63)   | California (56)     | California (54)     |
| Delaware (54)       | New Jersey (56)     | California (54)     | California (55)     | Wisconsin (63)      | Maine (56)          | Kansas (53)         |
| Virginia (54)       | Delaware (55)       | New Jersey (54)     | Washington (55)     | Washington (62)     | Washington (55)     | New Jersey (53)     |
| Maine (53)          | Washington (55)     | Iowa (53)           | Rhode Island (53)   | Massachusetts (61)  | Virginia (55)       | Nebraska (53)       |
| Alabama (53)        | Rhode Island (55)   | Colorado (52)       | Minnesota (52)      | Maryland (60)       | Colorado (55)       | Maine (52)          |
| Idaho (52)          | Iowa (54)           | Hawaii (52)         | Delaware (51)       | Idaho (60)          | New Jersey (54)     | Connecticut (51)    |
| Iowa (51)           | Arkansas (54)       | West Virginia (51)  | Virginia (50)       | New Hampshire (58)  | Massachusetts (54)  | Idaho (51)          |
| Washington (51)     | Connecticut (52)    | South Dakota (51)   | Connecticut (47)    | Connecticut (56)    | Wisconsin (53)      | Washington (50)     |
| Oklahoma (51)       | Wyoming (51)        | Rhode Island (49)   | Idaho (47)          | Minnesota (54)      | Vermont (53)        | Massachusetts (49)  |
| Nevada (50)         | New Hampshire (51)  | New Hampshire (48)  | Montana (46)        | New Jersey (53)     | Alaska (53)         | Oregon (49)         |
| New Jersey (50)     | Hawaii (49)         | Connecticut (47)    | New Jersey (46)     | Utah (53)           | Connecticut (53)    | Wisconsin (48)      |
| Connecticut (50)    | Oregon (47)         | Utah (45)           | Vermont (44)        | Kansas (52)         | Hawaii (53)         | Colorado (48)       |
| Oregon (49)         | Idaho (47)          | Idaho (40)          | Maine (43)          | Maine (52)          | Minnesota (52)      | Vermont (47)        |
| New Hampshire (47)  | Vermont (46)        | Maine (40)          | Utah (42)           | Oregon (49)         | Oregon (52)         | Minnesota (47)      |
| Utah (45)           | Virginia (46)       | Vermont (39)        | New Hampshire (40)  | Vermont (46)        | New Hampshire (44)  | New Hampshire (45)  |
| Vermont (42)        | Utah (43)           | Oregon (33)         | Oregon (32)         | Virginia (42)       | Utah (43)           | Utah (43)           |

**Table S3. Rankings and Scorings for the term ‘Gonorrhoea’ by State by year from 2004 to 2010.**

| 2004                 | 2005                | 2006                | 2007                | 2008                | 2009                | 2010                |
|----------------------|---------------------|---------------------|---------------------|---------------------|---------------------|---------------------|
| South Dakota (100)   | Mississippi (100)   | Wyoming (100)       | Iowa (100)          | North Dakota (100)  | West Virginia (100) | Mississippi (100)   |
| South Carolina (100) | Alabama (70)        | Rhode Island (62)   | West Virginia (92)  | Alabama (84)        | Mississippi (99)    | New Hampshire (90)  |
| Hawaii (94)          | Nebraska (65)       | Mississippi (59)    | Louisiana (82)      | Delaware (83)       | North Dakota (91)   | South Carolina (85) |
| Mississippi (57)     | Indiana (65)        | New Mexico (46)     | Alabama (79)        | West Virginia (80)  | New Mexico (75)     | Kentucky (83)       |
| Idaho (53)           | South Carolina (64) | Louisiana (45)      | South Carolina (76) | Montana (77)        | South Carolina (71) | Alaska (78)         |
| Georgia (52)         | Iowa (64)           | North Dakota (44)   | Montana (74)        | Vermont (76)        | North Carolina (70) | Rhode Island (76)   |
| Maine (52)           | North Dakota (62)   | Hawaii (44)         | Mississippi (74)    | Mississippi (74)    | Oklahoma (68)       | Louisiana (76)      |
| Ohio (51)            | West Virginia (60)  | DC (42)             | Maine (70)          | South Carolina (73) | Alabama (68)        | North Carolina (74) |
| Kentucky (50)        | Alaska (58)         | Ohio (39)           | Nebraska (69)       | New Mexico (72)     | New Hampshire (65)  | Delaware (72)       |
| New Mexico (48)      | Connecticut (56)    | Nevada (38)         | Alaska (68)         | Kentucky (71)       | Maryland (64)       | Pennsylvania (72)   |
| Arizona (44)         | Rhode Island (55)   | Illinois (38)       | Pennsylvania (68)   | Tennessee (67)      | Pennsylvania (64)   | Connecticut (68)    |
| Connecticut (43)     | Illinois (54)       | Michigan (37)       | Texas (67)          | North Carolina (66) | Connecticut (63)    | Tennessee (67)      |
| Pennsylvania (41)    | New York (53)       | Idaho (35)          | Wisconsin (65)      | Florida (64)        | Maine (63)          | Florida (67)        |
| Rhode Island (40)    | Arkansas (53)       | Pennsylvania (35)   | Maryland (64)       | Hawaii (64)         | Texas (61)          | West Virginia (66)  |
| Florida (40)         | Oregon (52)         | Wisconsin (34)      | Connecticut (63)    | Michigan (64)       | Vermont (60)        | Indiana (65)        |
| Virginia (39)        | Pennsylvania (52)   | Kentucky (33)       | Indiana (63)        | Arkansas (62)       | New Jersey (60)     | Alabama (65)        |
| Louisiana (38)       | Ohio (52)           | Missouri (33)       | Missouri (63)       | Georgia (62)        | Louisiana (59)      | Georgia (64)        |
| New Jersey (38)      | Massachusetts (51)  | Oregon (32)         | Kansas (58)         | Pennsylvania (61)   | Indiana (58)        | Michigan (63)       |
| Alabama (37)         | Georgia (49)        | Texas (32)          | Tennessee (58)      | Texas (60)          | Ohio (57)           | South Dakota (62)   |
| DC (37)              | Minnesota (48)      | Iowa (32)           | Kentucky (58)       | New York (60)       | Florida (57)        | Maryland (60)       |
| Texas (37)           | Maine (47)          | Minnesota (31)      | New Jersey (57)     | Ohio (60)           | New York (57)       | Kansas (60)         |
| North Carolina (36)  | Idaho (47)          | New Jersey (31)     | Florida (56)        | Maryland (60)       | Wyoming (57)        | New York (59)       |
| Illinois (35)        | Wisconsin (46)      | Indiana (31)        | Ohio (56)           | Nebraska (59)       | Hawaii (56)         | Arkansas (59)       |
| Oklahoma (34)        | Michigan (46)       | Georgia (31)        | Georgia (55)        | Kansas (58)         | Georgia (55)        | New Jersey (59)     |
| Iowa (33)            | Montana (45)        | Alabama (30)        | North Carolina (54) | Rhode Island (57)   | Kentucky (55)       | Texas (58)          |
| Kansas (32)          | Florida (44)        | Washington (30)     | Minnesota (53)      | Indiana (56)        | Delaware (54)       | North Dakota (57)   |
| Michigan (31)        | Texas (43)          | Oklahoma (29)       | Virginia (52)       | Louisiana (55)      | Michigan (53)       | Wyoming (57)        |
| Massachusetts (31)   | Maryland (41)       | New Hampshire (29)  | Arkansas (51)       | New Jersey (53)     | Missouri (53)       | Ohio (56)           |
| New York (31)        | California (38)     | Maryland (29)       | New York (50)       | Missouri (53)       | Oregon (51)         | Illinois (55)       |
| Indiana (30)         | Washington (37)     | North Carolina (28) | North Dakota (50)   | Wyoming (53)        | Utah (50)           | Iowa (54)           |
| Colorado (29)        | New Jersey (35)     | New York (27)       | New Mexico (49)     | Iowa (53)           | Wisconsin (49)      | Hawaii (53)         |
| Missouri (29)        | Arizona (35)        | Kansas (27)         | Colorado (49)       | Illinois (53)       | Arkansas (49)       | Missouri (53)       |
| Maryland (28)        | Tennessee (35)      | Florida (27)        | Oklahoma (49)       | Maine (53)          | Rhode Island (49)   | Arizona (52)        |
| Montana (28)         | Wyoming (34)        | Tennessee (27)      | Washington (48)     | Wisconsin (52)      | Illinois (48)       | Oklahoma (51)       |
| Oregon (26)          | Missouri (34)       | Virginia (25)       | Michigan (48)       | Connecticut (48)    | Massachusetts (48)  | Maine (51)          |
| New Hampshire (25)   | Colorado (33)       | California (24)     | Illinois (48)       | New Hampshire (48)  | Idaho (46)          | Wisconsin (50)      |
| Minnesota (25)       | North Carolina (33) | South Dakota (24)   | Delaware (48)       | Alaska (46)         | Nebraska (46)       | Massachusetts (50)  |
| California (25)      | Virginia (33)       | Massachusetts (23)  | Arizona (43)        | Massachusetts (44)  | South Dakota (45)   | Utah (46)           |
| West Virginia (24)   | New Hampshire (30)  | Maine (22)          | DC (43)             | South Dakota (44)   | Iowa (45)           | Washington (44)     |
| Utah (4)             | Oklahoma (28)       | Connecticut (22)    | California (42)     | Minnesota (43)      | Tennessee (44)      | New Mexico (44)     |
| Washington (23)      | South Dakota (27)   | West Virginia (22)  | Nevada (42)         | Utah (42)           | DC (43)             | DC (43)             |
| Wisconsin (20)       | DC (21)             | Alaska (18)         | Oregon (40)         | Colorado (42)       | Nevada (43)         | Nebraska (42)       |
| Tennessee (18)       | Louisiana (20)      | Nebraska (17)       | Rhode Island (39)   | DC (40)             | Kansas (42)         | Idaho (41)          |
| Arkansas (15)        | Utah (19)           | Utah (17)           | South Dakota (39)   | Oregon (39)         | Arizona (42)        | Colorado (40)       |
| Nevada (12)          | Kansas (19)         | Arizona (17)        | Massachusetts (35)  | Arizona (39)        | Washington (40)     | Minnesota (40)      |
| Nebraska (11)        | Kentucky (18)       | Arkansas (17)       | New Hampshire (33)  | Virginia (38)       | Alaska (40)         | Nevada (39)         |
| Alaska               | Nevada (18)         | Colorado (16)       | Idaho (31)          | California (37)     | California (37)     | Oregon (33)         |
| Delaware             | Vermont (17)        | South Carolina (12) | Vermont (31)        | Oklahoma (36)       | Colorado (36)       | Montana (29)        |
| North Dakota         | New Mexico (13)     | Montana (10)        | Utah (31)           | Nevada (33)         | Montana (33)        | California (29)     |
| Vermont              | Delaware            | Vermont (9)         | Hawaii (29)         | Washington (33)     | Minnesota (31)      | Vermont (28)        |
| Wyoming              | Hawaii              | Delaware            | Wyoming (20)        | Idaho (23)          | Virginia (26)       | Virginia (28)       |

**Table S4. Rankings and Scorings for the term ‘Gonorrhoea’ by State by year from 2011 to 2017.**

| 2011                | 2012                | 2013                | 2014                | 2015                | 2016                | 2017                |
|---------------------|---------------------|---------------------|---------------------|---------------------|---------------------|---------------------|
| West Virginia (100) | Mississippi (100)   | Mississippi (100)   | Mississippi (100)   | Mississippi (100)   | Mississippi (100)   | Mississippi (100)   |
| Mississippi (86)    | Louisiana (84)      | Louisiana (93)      | Louisiana (98)      | Louisiana (81)      | Louisiana (86)      | Arkansas (82)       |
| South Dakota (80)   | Georgia (74)        | Georgia (74)        | Kentucky (89)       | Georgia (78)        | South Dakota (80)   | DC (81)             |
| Delaware (77)       | Texas (70)          | Texas (72)          | South Carolina (83) | South Carolina (74) | Georgia (79)        | Alabama (76)        |
| Louisiana (77)      | DC (70)             | DDC (70)            | Alaska (83)         | Kentucky (73)       | Alabama (79)        | Louisiana (76)      |
| Georgia (73)        | Illinois (68)       | New Mexico (69)     | Georgia (82)        | Michigan (71)       | Arkansas (78)       | Georgia (75)        |
| Arkansas (70)       | West Virginia (66)  | Kentucky (67)       | Oklahoma (81)       | Texas (71)          | DC (77)             | South Carolina (74) |
| South Carolina (70) | North Dakota (66)   | Oklahoma (67)       | DC (77)             | West Virginia (70)  | South Carolina (76) | West Virginia (72)  |
| Texas (65)          | Indiana (65)        | Tennessee (66)      | Texas (74)          | Missouri (70)       | Indiana (75)        | Alaska (71)         |
| Alabama (65)        | Pennsylvania (63)   | Florida (64)        | Alabama (74)        | Oklahoma (70)       | Texas (74)          | Tennessee (70)      |
| Wyoming (65)        | Missouri (62)       | Illinois (63)       | Indiana (73)        | Alabama (69)        | North Carolina (73) | New Mexico (66)     |
| Maine (65)          | Oklahoma (62)       | Kansas (63)         | Tennessee (73)      | Wyoming (67)        | West Virginia (73)  | Illinois (66)       |
| Kentucky (63)       | Florida (62)        | Pennsylvania (62)   | Missouri (73)       | Tennessee (67)      | New Mexico (72)     | Kentucky (66)       |
| Pennsylvania (63)   | Michigan (62)       | Hawaii (61)         | West Virginia (72)  | North Carolina (66) | Nevada (69)         | Maryland (65)       |
| Florida (62)        | Massachusetts (60)  | New York (61)       | Maine (72)          | DC (66)             | Maryland (69)       | Florida (64)        |
| Indiana (62)        | Kentucky (60)       | Rhode Island (61)   | Nebraska (72)       | Arkansas (63)       | Tennessee (69)      | Missouri (64)       |
| Kansas (61)         | Iowa (60)           | Missouri (60)       | Michigan (70)       | Florida (63)        | New York (68)       | Texas (64)          |
| Iowa (61)           | Alabama (59)        | Nevada (60)         | Florida (70)        | Nevada (63)         | Delaware (67)       | North Carolina (64) |
| New Jersey (59)     | South Dakota (59)   | South Dakota (60)   | Kansas (69)         | New York (63)       | Virginia (66)       | Indiana (63)        |
| Illinois (59)       | Ohio (59)           | Ohio (59)           | Illinois (68)       | Illinois (62)       | Florida (65)        | Oklahoma (62)       |
| Ohio (58)           | Alaska (58)         | South Carolina (59) | North Carolina (68) | South Dakota (62)   | Ohio (65)           | Delaware (61)       |
| Tennessee (58)      | North Carolina (58) | Alabama (59)        | New York (68)       | Washington (61)     | Pennsylvania (65)   | Ohio (61)           |
| North Carolina (58) | New Jersey (57)     | Maryland (59)       | Arkansas (67)       | Arizona (60)        | Illinois (64)       | Nevada (60)         |
| Nevada (56)         | Maryland (57)       | Michigan (59)       | Pennsylvania (67)   | Ohio (60)           | Arizona (63)        | Michigan (59)       |
| Rhode Island (56)   | Tennessee (57)      | North Carolina (59) | Nevada (5)          | Iowa (60)           | California (63)     | Pennsylvania (58)   |
| Oklahoma (56)       | New York (57)       | Arkansas (57)       | Maryland (65)       | Indiana (59)        | Kentucky (62)       | New Jersey (58)     |
| New York (56)       | Rhode Island (53)   | New Jersey (57)     | Ohio (65)           | Pennsylvania (59)   | Wyoming (62)        | New York (57)       |
| DC (54)             | Arizona (53)        | West Virginia (56)  | South Dakota (65)   | California (58)     | Michigan (61)       | Arizona (57)        |
| Missouri (53)       | New Mexico (53)     | Virginia (56)       | Arizona (63)        | Hawaii (56)         | Oklahoma (61)       | Kansas (57)         |
| Michigan (53)       | South Carolina (53) | Wisconsin (55)      | Delaware (63)       | Maryland (56)       | Maine (60)          | California (55)     |
| Maryland (53)       | Minnesota (52)      | California (54)     | New Jersey (62)     | Nebraska (55)       | North Dakota (60)   | North Dakota (55)   |
| Virginia (52)       | Arkansas (52)       | Connecticut (53)    | California (62)     | New Mexico (55)     | Alaska (59)         | Virginia (55)       |
| New Mexico (51)     | New Hampshire (52)  | Delaware (53)       | Rhode Island (61)   | Idaho (54)          | Missouri (59)       | Connecticut (53)    |
| Connecticut (51)    | Maine (52)          | Arizona (53)        | New Hampshire (60)  | New Hampshire (50)  | New Jersey (59)     | Wyoming (52)        |
| Wisconsin (50)      | Delaware (51)       | Washington (52)     | Colorado (59)       | Kansas (50)         | Utah (57)           | South Dakota (52)   |
| Massachusetts (48)  | Nevada (51)         | Indiana (52)        | Iowa (59)           | Vermont (50)        | Idaho (57)          | Rhode Island (51)   |
| Arizona (48)        | Wisconsin (51)      | Vermont (52)        | Washington (58)     | Connecticut (49)    | Iowa (57)           | Montana (50)        |
| North Dakota (47)   | Hawaii (51)         | Nebraska (52)       | New Mexico (57)     | Maine (48)          | Nebraska (55)       | Massachusetts (50)  |
| California (47)     | California (50)     | Alaska (52)         | Montana (57)        | Wisconsin (48)      | Kansas (55)         | Nebraska (50)       |
| Minnesota (47)      | Montana (50)        | Montana (51)        | North Dakota (57)   | Utah (47)           | Hawaii (55)         | Washington (50)     |
| New Hampshire (46)  | Nebraska (49)       | North Dakota (49)   | Wisconsin (55)      | Rhode Island (47)   | Oregon (53)         | Idaho (49)          |
| Nebraska (44)       | Kansas (49)         | Massachusetts (47)  | Minnesota (54)      | New Jersey (46)     | Connecticut (53)    | Wisconsin (48)      |
| Washington (43)     | Washington (48)     | Iowa (46)           | Massachusetts (53)  | Montana (46)        | Colorado (51)       | New Hampshire (47)  |
| Oregon (43)         | Colorado (48)       | Minnesota (46)      | Hawaii (51)         | Colorado (45)       | Montana (51)        | Colorado (47)       |
| Colorado (41)       | Wyoming (47)        | Colorado (46)       | Virginia (50)       | Delaware (45)       | Washington (51)     | Oregon (46)         |
| Vermont (40)        | Virginia (46)       | Utah (46)           | Connecticut (48)    | Massachusetts (44)  | Massachusetts (50)  | Iowa (45)           |
| Alaska (39)         | Connecticut (44)    | New Hampshire (44)  | Idaho (46)          | North Dakota (43)   | Wisconsin (49)      | Minnesota (44)      |
| Utah (38)           | Idaho (44)          | Idaho (44)          | Utah (44)           | Minnesota (42)      | Minnesota (48)      | Utah (43)           |
| Hawaii (37)         | Oregon (42)         | Maine (43)          | Vermont (43)        | Alaska (37)         | Rhode Island (46)   | Hawaii (37)         |
| Idaho (32)          | Utah (34)           | Wyoming (36)        | Wyoming (42)        | Virginia (36)       | New Hampshire (44)  | Maine (36)          |
| Montana (32)        | Vermont (34)        | Oregon (27)         | Oregon (32)         | Oregon (35)         | Vermont (43)        | Vermont (34)        |

**Table S5. Rankings and Scorings for the term ‘Syphilis’ by State by year from 2004 to 2010.**

| 2004                 | 2005                | 2006                | 2007                | 2008                | 2009                | 2010                      |
|----------------------|---------------------|---------------------|---------------------|---------------------|---------------------|---------------------------|
| South Dakota (100)   | Mississippi (100)   | Wyoming (100)       | Iowa (100)          | North Dakota (100)  | West Virginia (100) | Mississippi (100)         |
| South Carolina (100) | Alabama (70)        | Rhode Island (62)   | West Virginia (92)  | Alabama (84)        | Mississippi (99)    | New Hampshire (90)        |
| Hawaii (94)          | Nebraska (65)       | Mississippi (59)    | Louisiana (82)      | Delaware (83)       | North Dakota (91)   | South Carolina (85)       |
| Mississippi (57)     | Indiana (65)        | New Mexico (46)     | Alabama (79)        | West Virginia (80)  | New Mexico (75)     | Kentucky (83)             |
| Idaho (53)           | South Carolina (64) | Louisiana (45)      | South Carolina (76) | Montana (77)        | South Carolina (71) | Alaska (78)               |
| Georgia (52)         | Iowa (64)           | North Dakota (44)   | Montana (74)        | Vermont (76)        | North Carolina (70) | Rhode Island (76)         |
| Maine (52)           | North Dakota (62)   | Hawaii (44)         | Mississippi (74)    | Mississippi (74)    | Oklahoma (68)       | Louisiana (76)            |
| Ohio (51)            | West Virginia (60)  | DC (42)             | Maine (70)          | South Carolina (73) | Alabama (68)        | North Carolina (74)       |
| Kentucky (50)        | Alaska (58)         | Ohio (39)           | Nebraska (69)       | New Mexico (72)     | New Hampshire (65)  | Delaware (72)             |
| New Mexico (48)      | Connecticut (56)    | Nevada (38)         | Alaska (68)         | Kentucky (71)       | Maryland (64)       | Pennsylvania (72)         |
| Arizona (44)         | Rhode Island (55)   | Illinois (38)       | Pennsylvania (68)   | Tennessee (67)      | Pennsylvania (64)   | Connecticut (68)          |
| Connecticut (43)     | Illinois (54)       | Michigan (37)       | Texas (67)          | North Carolina (66) | Connecticut (63)    | Tennessee (67)            |
| Pennsylvania (41)    | New York (53)       | Idaho (35)          | Wisconsin (65)      | Florida (64)        | Maine (63)          | Florida (67)              |
| Rhode Island (40)    | Arkansas (53)       | Pennsylvania (35)   | Maryland (64)       | Hawaii (64)         | Texas (61)          | West Virginia (66)        |
| Florida (40)         | Oregon (52)         | Wisconsin (34)      | Connecticut (63)    | Michigan (64)       | Vermont (60)        | Indiana (65)              |
| Virginia (39)        | Pennsylvania (52)   | Kentucky (33)       | Indiana (63)        | Arkansas (62)       | New Jersey (60)     | Alabama (65)              |
| Louisiana (38)       | Ohio (52)           | Missouri (33)       | Missouri (63)       | Georgia (62)        | Louisiana (59)      | Georgia (64)              |
| New Jersey (38)      | Massachusetts (51)  | Oregon (32)         | Kansas (58)         | Pennsylvania (61)   | Indiana (58)        | Michigan (3)              |
| Alabama (37)         | Georgia (49)        | Texas (32)          | Tennessee (58)      | Texas (60)          | Ohio (57)           | South Dakota (62)         |
| DC (37)              | Minnesota (48)      | Iowa (32)           | Kentucky (58)       | New York (60)       | Florida (57)        | Maryland (60)             |
| Texas (37)           | Maine (47)          | Minnesota (31)      | New Jersey (57)     | Ohio (60)           | New York (57)       | Kansas (60)               |
| North Carolina (36)  | Idaho (47)          | New Jersey (31)     | Florida (56)        | Maryland (60)       | Wyoming (57)        | New York (59)             |
| Illinois (35)        | Wisconsin (46)      | Indiana (31)        | Ohio (56)           | Nebraska (59)       | Hawaii (56)         | Arkansas (59)             |
| Oklahoma (34)        | Michigan (46)       | Georgia (31)        | Georgia (55)        | Kansas (58)         | Georgia (55)        | New Jersey (59)           |
| Iowa (33)            | Montana (45)        | Alabama (30)        | North Carolina (54) | Rhode Island (57)   | Kentucky (55)       | Texas (58)                |
| Kansas (32)          | Florida (44)        | Washington (30)     | Minnesota (53)      | Indiana (56)        | Delaware (54)       | North Dakota (57)         |
| Michigan (31)        | Texas (43)          | Oklahoma (29)       | Virginia (52)       | Louisiana (55)      | Michigan (53)       | Wyoming (57)              |
| Massachusetts (31)   | Maryland (41)       | New Hampshire (29)  | Arkansas (51)       | New Jersey (53)     | Missouri (53)       | Ohio (56)                 |
| New York (31)        | California (38)     | Maryland (29)       | New York (50)       | Missouri (53)       | Oregon (51)         | Illinois (55)             |
| Indiana (30)         | Washington (37)     | North Carolina (29) | North Dakota (50)   | Wyoming (53)        | Utah (50)           | Iowa (54)                 |
| Colorado (29)        | New Jersey (35)     | New York (27)       | New Mexico (49)     | Iowa (53)           | Wisconsin (49)      | Hawaii (53)               |
| Missouri (29)        | Arizona (35)        | Kansas (27)         | Colorado (49)       | Illinois (53)       | Arkansas (49)       | Missouri (53)             |
| Maryland (28)        | Tennessee (35)      | Florida (27)        | Oklahoma (49)       | Maine (53)          | Rhode Island (49)   | Arizona (52)              |
| Montana (28)         | Wyoming (34)        | Tennessee (27)      | Washington (48)     | Wisconsin (52)      | Illinois (48)       | Oklahoma (51)             |
| Oregon (26)          | Missouri (34)       | Virginia (25)       | Michigan (48)       | Connecticut (48)    | Massachusetts (48)  | Maine (52)                |
| New Hampshire (25)   | Colorado (33)       | California (24)     | Illinois (48)       | New Hampshire (48)  | Idaho (46)          | Wisconsin (50)            |
| Minnesota (25)       | North Carolina (33) | South Dakota (24)   | Delaware (48)       | Alaska (46)         | Nebraska (46)       | Massachusetts (50)        |
| California (25)      | Virginia (33)       | Massachusetts (23)  | Arizona (43)        | Massachusetts (44)  | South Dakota (45)   | Utah (46)                 |
| West Virginia (24)   | New Hampshire (30)  | Maine (22)          | DC (43)             | South Dakota (44)   | Iowa (45)           | Washington (44)           |
| Utah (24)            | Oklahoma (28)       | Connecticut (22)    | California (42)     | Minnesota (43)      | Tennessee (44)      | New Mexico (44)           |
| Washington (23)      | South Dakota (27)   | West Virginia (22)  | Nevada (42)         | Utah (42)           | DC (43)             | District of Columbia (43) |
| Wisconsin (20)       | DC (21)             | Alaska (18)         | Oregon (40)         | Colorado (42)       | Nevada (43)         | Nebraska (42)             |
| Tennessee (18)       | Louisiana (20)      | Nebraska (17)       | Rhode Island (39)   | DC (40)             | Kansas (42)         | Idaho (41)                |
| Arkansas (15)        | Utah (19)           | Utah (17)           | South Dakota (39)   | Oregon (39)         | Arizona (2)         | Colorado (40)             |
| Nevada (12)          | Kansas (19)         | Arizona (17)        | Massachusetts (35)  | Arizona (39)        | Washington (40)     | Minnesota (40)            |
| Nebraska (11)        | Kentucky (18)       | Arkansas (17)       | New Hampshire (33)  | Virginia (38)       | Alaska (40)         | Nevada (39)               |
| Alaska               | Nevada (18)         | Colorado (16)       | Idaho (31)          | California (37)     | California (37)     | Oregon (33)               |
| Delaware             | Vermont (17)        | South Carolina (12) | Vermont (31)        | Oklahoma (36)       | Colorado (36)       | Montana (29)              |
| North Dakota         | New Mexico (13)     | Montana (10)        | Utah (31)           | Nevada (33)         | Montana (33)        | California (29)           |
| Vermont              | Delaware            | Vermont (9)         | Hawaii (29)         | Washington (33)     | Minnesota (31)      | Vermont (28)              |
| Wyoming              | Hawaii              | Delaware            | Wyoming (20)        | Idaho (23)          | Virginia (26)       | Virginia (28)             |

**Table S6. Rankings and Scorings for the term ‘Syphilis’ by State by year from 2011 to 2017.**

| 2011                | 2012                | 2013                | 2014                | 2015                | 2016                | 2017                |
|---------------------|---------------------|---------------------|---------------------|---------------------|---------------------|---------------------|
| West Virginia (100) | Mississippi (100)   | Mississippi (100)   | Mississippi (100)   | Mississippi (100)   | Mississippi (100)   | Mississippi (100)   |
| Mississippi (86)    | Louisiana (84)      | Louisiana (93)      | Louisiana (98)      | Louisiana (81)      | Louisiana (86)      | Arkansas (82)       |
| South Dakota (80)   | Georgia (74)        | Georgia (74)        | Kentucky (89)       | Georgia (78)        | South Dakota (80)   | DC (81)             |
| Delaware (77)       | Texas (70)          | Texas (72)          | South Carolina (83) | South Carolina (74) | Georgia (79)        | Alabama (76)        |
| Louisiana (77)      | DC (70)             | DC (70)             | Alaska (83)         | Kentucky (73)       | Alabama (79)        | Louisiana (76)      |
| Georgia (73)        | Illinois (68)       | New Mexico (69)     | Georgia (82)        | Michigan (71)       | Arkansas (78)       | Georgia (75)        |
| Arkansas (70)       | West Virginia (66)  | Kentucky (67)       | Oklahoma (81)       | Texas (71)          | DC (77)             | South Carolina (74) |
| South Carolina (70) | North Dakota (66)   | Oklahoma (67)       | DC (77)             | West Virginia (70)  | South Carolina (76) | West Virginia (72)  |
| Texas (65)          | Indiana (65)        | Tennessee (66)      | Texas (74)          | Missouri (70)       | Indiana (75)        | Alaska (71)         |
| Alabama (65)        | Pennsylvania (63)   | Florida (64)        | Alabama (74)        | Oklahoma (70)       | Texas (74)          | Tennessee (70)      |
| Wyoming (65)        | Missouri (62)       | Illinois (63)       | Indiana (73)        | Alabama (69)        | North Carolina (73) | New Mexico (66)     |
| Maine (65)          | Oklahoma (62)       | Kansas (63)         | Tennessee (73)      | Wyoming (67)        | West Virginia (73)  | Illinois (66)       |
| Kentucky (63)       | Florida (62)        | Pennsylvania (62)   | Missouri (73)       | Tennessee (67)      | New Mexico (72)     | Kentucky (66)       |
| Pennsylvania (63)   | Michigan (62)       | Hawaii (61)         | West Virginia (72)  | North Carolina (66) | Nevada (69)         | Maryland (65)       |
| Florida (62)        | Massachusetts (60)  | New York (61)       | Maine (72)          | DC (66)             | Maryland (69)       | Florida (64)        |
| Indiana (62)        | Kentucky (60)       | Rhode Island (61)   | Nebraska (72)       | Arkansas (63)       | Tennessee (69)      | Missouri (64)       |
| Kansas (61)         | Iowa (60)           | Missouri (60)       | Michigan (70)       | Florida (63)        | New York (68)       | Texas (64)          |
| Iowa (61)           | Alabama (59)        | Nevada (60)         | Florida (70)        | Nevada (63)         | Delaware (67)       | North Carolina (64) |
| New Jersey (59)     | South Dakota (59)   | South Dakota (60)   | Kansas (69)         | New York (63)       | Virginia (66)       | Indiana (63)        |
| Illinois (59)       | Ohio (59)           | Ohio (59)           | Illinois (68)       | Illinois (62)       | Florida (65)        | Oklahoma (62)       |
| Ohio (58)           | Alaska (58)         | South Carolina (59) | North Carolina (68) | South Dakota (62)   | Ohio (65)           | Delaware (61)       |
| Tennessee (58)      | North Carolina (58) | Alabama (59)        | New York (68)       | Washington (61)     | Pennsylvania (65)   | Ohio (61)           |
| North Carolina (58) | New Jersey (57)     | Maryland (59)       | Arkansas (67)       | Arizona (60)        | Illinois (64)       | Nevada (60)         |
| Nevada (56)         | Maryland (57)       | Michigan (59)       | Pennsylvania (67)   | Ohio (60)           | Arizona (63)        | Michigan (59)       |
| Rhode Island (56)   | Tennessee (57)      | North Carolina (59) | Nevada (65)         | Iowa (60)           | California (63)     | Pennsylvania (58)   |
| Oklahoma (56)       | New York (57)       | Arkansas (57)       | Maryland (65)       | Indiana (59)        | Kentucky (62)       | New Jersey (58)     |
| New York (56)       | Rhode Island (53)   | New Jersey (57)     | Ohio (65)           | Pennsylvania (59)   | Wyoming (62)        | New York (57)       |
| DC (54)             | Arizona (53)        | West Virginia (56)  | South Dakota (65)   | California (58)     | Michigan (61)       | Arizona (57)        |
| Missouri (53)       | New Mexico (53)     | Virginia (56)       | Arizona (63)        | Hawaii (56)         | Oklahoma (61)       | Kansas (57)         |
| Michigan (53)       | South Carolina (53) | Wisconsin (55)      | Delaware (63)       | Maryland (56)       | Maine (60)          | California (55)     |
| Maryland (53)       | Minnesota (52)      | California (54)     | New Jersey (62)     | Nebraska (55)       | North Dakota (60)   | North Dakota (55)   |
| Virginia (52)       | Arkansas (52)       | Connecticut (53)    | California (62)     | New Mexico (55)     | Alaska (59)         | Virginia (55)       |
| New Mexico (51)     | New Hampshire (52)  | Delaware (53)       | Rhode Island (61)   | Idaho (54)          | Missouri (59)       | Connecticut (53)    |
| Connecticut (51)    | Maine (52)          | Arizona (53)        | New Hampshire (60)  | New Hampshire (50)  | New Jersey (59)     | Wyoming (52)        |
| Wisconsin (50)      | Delaware (51)       | Washington (52)     | Colorado (59)       | Kansas (50)         | Utah (57)           | South Dakota (52)   |
| Massachusetts (48)  | Nevada (51)         | Indiana (52)        | Iowa (59)           | Vermont (50)        | Idaho (57)          | Rhode Island (51)   |
| Arizona (48)        | Wisconsin (51)      | Vermont (52)        | Washington (58)     | Connecticut (49)    | Iowa (57)           | Montana (50)        |
| North Dakota (47)   | Hawaii (51)         | Nebraska (52)       | New Mexico (57)     | Maine (48)          | Nebraska (55)       | Massachusetts (50)  |
| California (47)     | California (50)     | Alaska (52)         | Montana (57)        | Wisconsin (48)      | Kansas (55)         | Nebraska (50)       |
| Minnesota (47)      | Montana (50)        | Montana (51)        | North Dakota (57)   | Utah (47)           | Hawaii (55)         | Washington (50)     |
| New Hampshire (46)  | Nebraska (49)       | North Dakota (49)   | Wisconsin (55)      | Rhode Island (47)   | Oregon (53)         | Idaho (49)          |
| Nebraska (44)       | Kansas (49)         | Massachusetts (47)  | Minnesota (54)      | New Jersey (46)     | Connecticut (53)    | Wisconsin (48)      |
| Washington (43)     | Washington (48)     | Iowa (46)           | Massachusetts (53)  | Montana (46)        | Colorado (51)       | New Hampshire (47)  |
| Oregon (43)         | Colorado (48)       | Minnesota (46)      | Hawaii (51)         | Colorado (45)       | Montana (51)        | Colorado (47)       |
| Colorado (41)       | Wyoming (47)        | Colorado (46)       | Virginia (50)       | Delaware (45)       | Washington (51)     | Oregon (46)         |
| Vermont (40)        | Virginia (46)       | Utah (46)           | Connecticut (48)    | Massachusetts (44)  | Massachusetts (50)  | Iowa (45)           |
| Alaska (39)         | Connecticut (44)    | New Hampshire (44)  | Idaho (46)          | North Dakota (43)   | Wisconsin (49)      | Minnesota (44)      |
| Utah (38)           | Idaho (44)          | Idaho (44)          | Utah (44)           | Minnesota (42)      | Minnesota (48)      | Utah (43)           |
| Hawaii (37)         | Oregon (42)         | Maine (43)          | Vermont (43)        | Alaska (37)         | Rhode Island (46)   | Hawaii (37)         |
| Idaho (32)          | Utah (34)           | Wyoming (36)        | Wyoming (42)        | Virginia (36)       | New Hampshire (44)  | Maine (36)          |
| Montana (32)        | Vermont (34)        | Oregon (27)         | Oregon (32)         | Oregon (35)         | Vermont (43)        | Vermont (34)        |

Tables S7&S8 and S9&S10 consist of the respective rankings and scorings for Tuberculosis and Hepatitis, respectively.

**Table S7.** Rankings and Scorings for the term ‘Tuberculosis’ by State by year from 2004 to 2010.

| 2004                | 2005                | 2006                | 2007                | 2008                | 2009                | 2010                |
|---------------------|---------------------|---------------------|---------------------|---------------------|---------------------|---------------------|
| Maine (100)         | Maine (100)         | New Mexico (100)    | Hawaii (100)        | New Mexico (100)    | Rhode Island (100)  | Maryland (100)      |
| North Dakota (97)   | Alaska (87)         | North Dakota (79)   | DC (97)             | Delaware (96)       | Delaware (99)       | Hawaii (95)         |
| Alaska (89)         | West Virginia (80)  | Hawaii (77)         | Maryland (94)       | Indiana (94)        | South Dakota (97)   | New Mexico (94)     |
| Kentucky (77)       | Nebraska (80)       | Indiana (73)        | Wyoming (92)        | Alaska (92)         | Hawaii (96)         | Delaware (91)       |
| Rhode Island (76)   | Wyoming (78)        | Arkansas (67)       | Arkansas (92)       | Maryland (90)       | Connecticut (93)    | Nebraska (89)       |
| Iowa (71)           | Montana (78)        | Maine (63)          | Delaware (92)       | Hawaii (86)         | Arkansas (91)       | Arkansas (89)       |
| Louisiana (70)      | South Carolina (77) | Tennessee (59)      | Georgia (88)        | Rhode Island (84)   | New Mexico (89)     | Connecticut (87)    |
| Indiana (59)        | Minnesota (75)      | Maryland (59)       | West Virginia (88)  | Kansas (83)         | Louisiana (85)      | North Dakota (86)   |
| Montana (58)        | Pennsylvania (72)   | Delaware (59)       | South Carolina (84) | Montana (83)        | Oklahoma (84)       | Massachusetts (83)  |
| Oklahoma (57)       | Colorado (71)       | Rhode Island (59)   | Missouri (83)       | Wisconsin (77)      | Nebraska (82)       | Louisiana (83)      |
| Georgia (56)        | Georgia (70)        | Illinois (59)       | New Hampshire (83)  | Mississippi (75)    | New Hampshire (79)  | Alabama (83)        |
| Maryland (52)       | Illinois (68)       | Iowa (59)           | Texas (81)          | Ohio (75)           | Kentucky (78)       | South Dakota (80)   |
| South Dakota (52)   | Virginia (66)       | Missouri (59)       | Ohio (81)           | North Dakota (74)   | Maryland (78)       | Florida (79)        |
| Ohio (49)           | Oklahoma (65)       | DC (58)             | Nebraska (80)       | Kentucky (74)       | California (75)     | Oklahoma (79)       |
| New Jersey (48)     | Connecticut (64)    | Louisiana (57)      | Vermont (80)        | California (74)     | Massachusetts (74)  | Iowa (77)           |
| Oregon (48)         | Michigan (62)       | Massachusetts (57)  | North Carolina (78) | Pennsylvania (73)   | DC (74)             | California (77)     |
| New York (47)       | Washington (61)     | Alaska (55)         | Montana (78)        | Virginia (73)       | Virginia (72)       | Kentucky (76)       |
| Washington (47)     | Tennessee (61)      | South Dakota (54)   | Kansas (77)         | West Virginia (73)  | Pennsylvania (71)   | Missouri (76)       |
| Colorado (46)       | Indiana (61)        | Michigan (54)       | Rhode Island (76)   | Massachusetts (72)  | Montana (71)        | Indiana (75)        |
| California (46)     | Louisiana (61)      | California (52)     | Oregon (76)         | Iowa (71)           | Georgia (70)        | Arizona (75)        |
| Idaho (45)          | Massachusetts (59)  | New Jersey (52)     | North Dakota (76)   | Louisiana (71)      | Alabama (70)        | Minnesota (75)      |
| Missouri (45)       | Maryland (58)       | Nevada (51)         | Mississippi (75)    | Oklahoma (70)       | North Dakota (69)   | New Jersey (74)     |
| Michigan (45)       | Missouri (58)       | Pennsylvania (51)   | Minnesota (73)      | Texas (69)          | Missouri (69)       | Colorado (74)       |
| Tennessee (44)      | Vermont (58)        | Florida (51)        | Pennsylvania (73)   | Wyoming (69)        | Idaho (68)          | Tennessee (74)      |
| Illinois (44)       | Oregon (57)         | Kentucky (50)       | Nevada (73)         | Utah (69)           | Indiana (67)        | North Carolina (74) |
| Arizona (43)        | California (57)     | Georgia (50)        | Tennessee (73)      | Oregon (68)         | Colorado (67)       | Maine (74)          |
| Massachusetts (43)  | New York (57)       | Alabama (50)        | Maine (73)          | Missouri (68)       | North Carolina (67) | Virginia (74)       |
| Minnesota (43)      | Mississippi (57)    | Texas (49)          | Alabama (72)        | Illinois (66)       | Illinois (66)       | South Carolina (73) |
| Alabama (43)        | DC (56)             | Colorado (49)       | Wisconsin (72)      | DC (65)             | Kansas (65)         | Vermont (73)        |
| Texas (41)          | New Jersey (56)     | Vermont (47)        | Colorado (71)       | Connecticut (65)    | Minnesota (65)      | New York (73)       |
| Kansas (41)         | Nevada (55)         | South Carolina (47) | Indiana (71)        | Colorado (64)       | Wisconsin (64)      | Washington (73)     |
| Hawaii (41)         | Wisconsin (54)      | Minnesota (46)      | Virginia (71)       | Arizona (64)        | Texas (64)          | Kansas (73)         |
| DC (40)             | North Dakota (54)   | Connecticut (45)    | Washington (67)     | Georgia (63)        | Arizona (63)        | DC (72)             |
| North Carolina (40) | Delaware (53)       | Wisconsin (44)      | Illinois (67)       | New York (62)       | New Jersey (63)     | Rhode Island (71)   |
| Arkansas (39)       | Idaho (53)          | Ohio (44)           | Massachusetts (67)  | Washington (62)     | Tennessee (63)      | Georgia (71)        |
| South Carolina (39) | North Carolina (52) | Oregon (43)         | Michigan (66)       | Tennessee (62)      | Oregon (62)         | Oregon (70)         |
| New Hampshire (38)  | Iowa (52)           | Washington (43)     | Kentucky (66)       | Minnesota (61)      | Mississippi (62)    | Alaska (69)         |
| Virginia (37)       | Arkansas (52)       | Kansas (41)         | California (66)     | New Jersey (61)     | Florida (62)        | Pennsylvania (69)   |
| Pennsylvania (37)   | Texas (51)          | New Hampshire (41)  | New York (65)       | Florida (61)        | South Carolina (61) | Wisconsin (68)      |
| West Virginia (37)  | Ohio (51)           | West Virginia (40)  | Florida (65)        | North Carolina (60) | Washington (60)     | Texas (67)          |
| Connecticut (35)    | Hawaii (50)         | Montana (40)        | New Jersey (65)     | South Carolina (59) | New York (59)       | Michigan (66)       |
| Florida (33)        | New Mexico (50)     | New York (40)       | Arizona (65)        | Nebraska (58)       | Wyoming (58)        | Ohio (65)           |
| Nebraska (33)       | Kansas (50)         | Arizona (36)        | Idaho (63)          | Idaho (58)          | Maine (57)          | Mississippi (65)    |
| New Mexico (33)     | Florida (47)        | Utah (35)           | Iowa (63)           | Alabama (58)        | Michigan (55)       | New Hampshire (63)  |
| Wisconsin (30)      | Arizona (41)        | Virginia (35)       | New Mexico (61)     | Michigan (53)       | West Virginia (54)  | Utah (63)           |
| Delaware (28)       | Kentucky (40)       | North Carolina (34) | South Dakota (60)   | New Hampshire (53)  | Utah (54)           | Illinois (62)       |
| Nevada (24)         | Alabama (39)        | Oklahoma (32)       | Connecticut (59)    | South Dakota (52)   | Ohio (54)           | Wyoming (59)        |
| Wyoming (22)        | Utah (36)           | Mississippi (30)    | Alaska (58)         | Nevada (49)         | Iowa (52)           | Idaho (59)          |
| Vermont (22)        | South Dakota (31)   | Idaho (26)          | Oklahoma (58)       | Arkansas (45)       | Alaska (49)         | Nevada (59)         |
| Utah (20)           | New Hampshire (29)  | Nebraska (16)       | Louisiana (58)      | Maine (35)          | Nevada (40)         | Montana (40)        |
| Mississippi (19)    | Rhode Island (12)   | Wyoming (13)        | Utah (58)           | Vermont (16)        | Vermont (38)        | West Virginia (38)  |



**Table S8.** Rankings and Scorings for the term ‘Tuberculosis’ by State by year from 2011 to 2017.

| 2011                | 2012                | 2013                | 2014                | 2015                | 2016                      | 2017                |
|---------------------|---------------------|---------------------|---------------------|---------------------|---------------------------|---------------------|
| Louisiana (100)     | North Dakota (100)  | Nevada (100)        | South Dakota (100)  | Delaware (100)      | Alaska (100)              | North Dakota (100)  |
| Mississippi (99)    | Wyoming (69)        | Maryland (99)       | Mississippi (99)    | Hawaii (97)         | South Dakota (83)         | Maryland (89)       |
| West Virginia (97)  | South Dakota (65)   | North Dakota (93)   | Maryland (97)       | Vermont (95)        | North Dakota (79)         | Montana (89)        |
| Alabama (93)        | New Mexico (60)     | South Carolina (92) | Nebraska (94)       | Montana (95)        | Connecticut (77)          | Delaware (88)       |
| Arkansas (93)       | Maryland (58)       | California (91)     | West Virginia (92)  | Maryland (92)       | Nebraska (74)             | California (86)     |
| Maine (90)          | Alabama (52)        | Wyoming (90)        | DC (90)             | Alaska (86)         | Alabama (71)              | Massachusetts (86)  |
| South Dakota (90)   | Delaware (52)       | Kentucky (90)       | Alabama (90)        | Mississippi (84)    | Oklahoma (71)             | Connecticut (86)    |
| Oklahoma (85)       | Mississippi (51)    | West Virginia (90)  | Vermont (90)        | Connecticut (82)    | Montana (70)              | Minnesota (85)      |
| Tennessee (84)      | Indiana (51)        | Iowa (88)           | Texas (90)          | Indiana (81)        | Hawaii (70)               | Alaska (84)         |
| Wyoming (83)        | Connecticut (51)    | New Mexico (88)     | Hawaii (89)         | West Virginia (81)  | Massachusetts (70)        | Texas (84)          |
| New Mexico (83)     | Kentucky (50)       | Vermont (88)        | Idaho (89)          | Utah (80)           | West Virginia (67)        | Hawaii (84)         |
| Maryland (81)       | Kansas (48)         | Connecticut (86)    | Missouri (89)       | Alabama (80)        | Minnesota (67)            | Indiana (83)        |
| Hawaii (80)         | Iowa (47)           | Virginia (85)       | Nevada (89)         | Idaho (80)          | Maryland (67)             | South Dakota (82)   |
| Rhode Island (80)   | Utah (46)           | Ohio (84)           | Connecticut (89)    | Kansas (79)         | District of Columbia (66) | Iowa (82)           |
| South Carolina (80) | Hawaii (45)         | Florida (83)        | Indiana (88)        | South Carolina (79) | New Mexico (66)           | Rhode Island (82)   |
| Missouri (80)       | Texas (45)          | Arizona (82)        | Arkansas (87)       | California (79)     | Iowa (65)                 | Vermont (81)        |
| Wisconsin (79)      | Colorado (45)       | DC (81)             | Arizona (85)        | Texas (77)          | California (65)           | North Carolina (79) |
| North Dakota (79)   | Alaska (45)         | North Carolina (81) | New Mexico (85)     | Arkansas (77)       | Texas (64)                | Arizona (78)        |
| North Carolina (79) | Nebraska (45)       | Idaho (81)          | Iowa (85)           | Minnesota (76)      | Utah (64)                 | Mississippi (77)    |
| New Jersey (77)     | Arkansas (45)       | Kansas (80)         | Georgia (85)        | Kentucky (75)       | Arizona (63)              | West Virginia (75)  |
| Indiana (76)        | DC (45)             | Arkansas (79)       | Alaska (85)         | DC (74)             | Virginia (63)             | Missouri (75)       |
| Texas (76)          | Pennsylvania (44)   | Hawaii (79)         | Wyoming (83)        | Maine (73)          | Idaho (63)                | Nevada (75)         |
| Nevada (75)         | Minnesota (44)      | Mississippi (79)    | California (83)     | New Mexico (73)     | Indiana (62)              | Utah (73)           |
| Kentucky (75)       | Louisiana (44)      | Oregon (79)         | North Carolina (82) | Louisiana (73)      | Missouri (61)             | Alabama (72)        |
| Ohio (74)           | Oklahoma (44)       | New Jersey (78)     | Utah (82)           | New Hampshire (73)  | Washington (61)           | Virginia (72)       |
| Alaska (73)         | Georgia (44)        | New York (78)       | South Carolina (82) | Pennsylvania (72)   | Rhode Island (61)         | Louisiana (72)      |
| Pennsylvania (73)   | Arizona (43)        | Massachusetts (78)  | Delaware (81)       | Georgia (72)        | Georgia (60)              | Wyoming (72)        |
| Delaware (73)       | Idaho (43)          | Wisconsin (78)      | North Dakota (81)   | Tennessee (72)      | Delaware (60)             | DC (72)             |
| Nebraska (72)       | North Carolina (43) | Indiana (77)        | New Hampshire (81)  | Wisconsin (71)      | New Jersey (60)           | New Jersey (71)     |
| Iowa (71)           | Ohio (43)           | Nebraska (76)       | New York (81)       | Massachusetts (69)  | Maine (60)                | Washington (71)     |
| Kansas (71)         | Wisconsin (42)      | Rhode Island (76)   | Pennsylvania (80)   | Iowa (69)           | New Hampshire (60)        | New York (71)       |
| Connecticut (71)    | New Jersey (42)     | Minnesota (75)      | New Jersey (80)     | Nebraska (69)       | New York (59)             | Kentucky (71)       |
| Florida (70)        | Tennessee (42)      | Missouri (75)       | Washington (80)     | Missouri (69)       | Illinois (59)             | Georgia (71)        |
| California (70)     | Missouri (42)       | Texas (75)          | Tennessee (79)      | Arizona (69)        | South Carolina (58)       | New Mexico (69)     |
| Washington (70)     | California (41)     | Tennessee (75)      | Oklahoma (79)       | South Dakota (68)   | Mississippi (58)          | Pennsylvania (69)   |
| Illinois (69)       | Massachusetts (41)  | Georgia (74)        | Minnesota (78)      | Ohio (68)           | Colorado (58)             | Arkansas (69)       |
| Idaho (69)          | Virginia (40)       | Louisiana (74)      | Kentucky (77)       | Colorado (68)       | Florida (57)              | Illinois (69)       |
| Massachusetts (69)  | Washington (40)     | Alabama (74)        | Ohio (76)           | New Jersey (67)     | Louisiana (57)            | Idaho (68)          |
| Michigan (68)       | Florida (39)        | Pennsylvania (74)   | Louisiana (76)      | Nevada (67)         | Pennsylvania (56)         | South Carolina (67) |
| Vermont (68)        | New York (39)       | Delaware (74)       | Kansas (76)         | Michigan (67)       | Nevada (56)               | Maine (66)          |
| Arizona (68)        | Illinois (39)       | Oklahoma (73)       | Wisconsin (75)      | Illinois (66)       | North Carolina (56)       | Oregon (66)         |
| Georgia (67)        | Maine (38)          | South Dakota (73)   | Florida (75)        | New York (65)       | Oregon (56)               | Wisconsin (66)      |
| Minnesota (66)      | New Hampshire (38)  | New Hampshire (73)  | Maine (75)          | Washington (65)     | Kentucky (56)             | Ohio (65)           |
| Virginia (65)       | Michigan (38)       | Alaska (72)         | Virginia (72)       | Virginia (63)       | Arkansas (55)             | Florida (65)        |
| Utah (64)           | Oregon (37)         | Washington (70)     | Colorado (2)        | Florida (62)        | Wyoming (54)              | Kansas (65)         |
| New York (64)       | Montana (34)        | Colorado (67)       | Illinois (72)       | North Carolina (62) | Ohio (54)                 | Oklahoma (65)       |
| DC (64)             | Rhode Island (33)   | Utah (66)           | Massachusetts (72)  | North Dakota (61)   | Wisconsin (54)            | Michigan (65)       |
| New Hampshire (62)  | Nevada (33)         | Illinois (66)       | Rhode Island (72)   | Rhode Island (59)   | Michigan (52)             | Colorado (64)       |
| Oregon (59)         | Vermont (33)        | Michigan (62)       | Michigan (69)       | Oregon (58)         | Tennessee (51)            | Tennessee (63)      |
| Colorado (59)       | West Virginia (31)  | Maine (55)          | Montana (60)        | Oklahoma (56)       | Kansas (51)               | Nebraska (62)       |
| Montana (47)        | South Carolina (31) | Montana (46)        | Oregon (55)         | Wyoming (44)        | Vermont (45)              | New Hampshire (59)  |

**Table S9. Rankings and Scorings for the term ‘Hepatitis’ by State by year from 2004 to 2010.**

| 2004                | 2005                | 2006                | 2007                | 2008                | 2009                | 2010                |
|---------------------|---------------------|---------------------|---------------------|---------------------|---------------------|---------------------|
| South Dakota (100)  | Kentucky (100)      | West Virginia (100) | West Virginia (100) | West Virginia (100) | Maryland (100)      | West Virginia (100) |
| Oklahoma (89)       | Mississippi (96)    | New Mexico (90)     | South Dakota (74)   | Nevada (98)         | North Dakota (87)   | Maryland (88)       |
| Wyoming (85)        | Hawaii (82)         | Nevada (89)         | New Mexico (64)     | Alabama (90)        | West Virginia (86)  | New Mexico (84)     |
| Tennessee (83)      | New Mexico (81)     | Maryland (86)       | Montana (63)        | New Mexico (89)     | Wyoming (86)        | Tennessee (83)      |
| New Hampshire (80)  | Louisiana (78)      | Maine (84)          | Hawaii (58)         | Maryland (87)       | Missouri (84)       | Kentucky (81)       |
| Montana (77)        | Tennessee (77)      | Kentucky (80)       | New Hampshire (57)  | Tennessee (83)      | Tennessee (83)      | South Dakota (80)   |
| West Virginia (76)  | Maine (74)          | Oklahoma (79)       | Maryland (57)       | Kentucky (82)       | New Mexico (83)     | Iowa (77)           |
| Kansas (76)         | Missouri (72)       | Pennsylvania (79)   | Idaho (57)          | Pennsylvania (82)   | Iowa (82)           | Indiana (77)        |
| Maine (75)          | Indiana (71)        | South Carolina (78) | Tennessee (56)      | Maine (81)          | Minnesota (82)      | Pennsylvania (72)   |
| North Dakota (73)   | Maryland (71)       | Alaska (78)         | Iowa (55)           | Hawaii (80)         | Kentucky (81)       | Ohio (70)           |
| Minnesota (72)      | Wyoming (69)        | North Dakota (77)   | Pennsylvania (55)   | Missouri (80)       | Nebraska (81)       | Alabama (70)        |
| New Jersey (72)     | Florida (66)        | Missouri (76)       | Arizona (55)        | Mississippi (79)    | Louisiana (80)      | Mississippi (70)    |
| Connecticut (71)    | Montana (66)        | Delaware (74)       | Delaware (55)       | Ohio (78)           | Indiana (80)        | Michigan (70)       |
| Alaska (70)         | Connecticut (66)    | Indiana (74)        | Oregon (54)         | Montana (77)        | Nevada (79)         | North Carolina (69) |
| Arkansas (69)       | Nevada (65)         | Mississippi (73)    | Louisiana (54)      | Connecticut (77)    | Hawaii (79)         | Florida (69)        |
| New Mexico (8)      | Pennsylvania (65)   | DC (72)             | Texas (53)          | Vermont (74)        | Florida (79)        | Colorado (68)       |
| Mississippi (66)    | Massachusetts (65)  | Vermont (70)        | Missouri (52)       | Oregon (74)         | Alabama (78)        | Louisiana (68)      |
| Washington (65)     | Kansas (64)         | Montana (70)        | Oklahoma (52)       | Iowa (74)           | Arkansas (77)       | Oklahoma (67)       |
| Maryland (65)       | Washington (64)     | North Carolina (69) | South Carolina (51) | Florida (73)        | Pennsylvania (76)   | Kansas (67)         |
| Hawaii (65)         | Texas (64)          | Florida (68)        | Indiana (51)        | Massachusetts (72)  | Oklahoma (75)       | Georgia (66)        |
| Massachusetts (65)  | Nebraska (64)       | Wisconsin (68)      | Maine (51)          | Georgia (72)        | Alaska (75)         | Alaska (64)         |
| Iowa (60)           | Oregon (64)         | Alabama (68)        | Alabama (51)        | Louisiana (71)      | Georgia (74)        | Nebraska (63)       |
| Missouri (60)       | Alabama (63)        | Oregon (68)         | Massachusetts (51)  | Michigan (71)       | New York (74)       | New York (63)       |
| Texas (60)          | West Virginia (63)  | Georgia (68)        | North Dakota (51)   | Minnesota (71)      | New Hampshire (73)  | Missouri (63)       |
| Indiana (59)        | Arizona (62)        | Texas (67)          | North Carolina (50) | South Carolina (70) | Montana (72)        | Montana (63)        |
| Florida (59)        | South Dakota (62)   | Connecticut (67)    | Washington (50)     | Arizona (70)        | Mississippi (72)    | South Carolina (62) |
| Louisiana (59)      | South Carolina (62) | Ohio (67)           | Minnesota (50)      | Indiana (70)        | North Carolina (71) | Illinois (61)       |
| North Carolina (58) | Colorado (62)       | Tennessee (66)      | DC (50)             | New York (69)       | New Jersey (71)     | Vermont (61)        |
| Pennsylvania (8)    | Michigan (59)       | New Jersey (66)     | Florida (49)        | New Hampshire (68)  | Texas (70)          | Connecticut (61)    |
| Virginia (58)       | New Hampshire (59)  | Utah (65)           | Mississippi (49)    | Washington (68)     | Wisconsin (70)      | New Jersey (61)     |
| Kentucky (57)       | Georgia (59)        | Massachusetts (65)  | Wisconsin (48)      | Delaware (67)       | Oregon (70)         | Oregon (61)         |
| Arizona (57)        | California (58)     | California (64)     | Kentucky (48)       | North Dakota (67)   | Idaho (69)          | Wyoming (61)        |
| California (57)     | Illinois (58)       | Hawaii (63)         | Nevada (47)         | California (67)     | Connecticut (68)    | Arizona (61)        |
| Wisconsin (55)      | Virginia (58)       | South Dakota (63)   | Illinois (47)       | Texas (67)          | Ohio (68)           | Texas (1)           |
| Nevada (54)         | Delaware (57)       | New York (62)       | Wyoming (47)        | Rhode Island (66)   | South Dakota (67)   | Minnesota (59)      |
| Delaware (54)       | New York (57)       | Michigan (62)       | New York (47)       | Oklahoma (66)       | Colorado (67)       | Massachusetts (59)  |
| Nebraska (53)       | DC (57)             | Idaho (62)          | Nebraska (47)       | Illinois (66)       | Michigan (67)       | Idaho (59)          |
| Illinois (53)       | Rhode Island (56)   | New Hampshire (61)  | New Jersey (46)     | Idaho (65)          | DC (67)             | Arkansas (58)       |
| Michigan (53)       | Ohio (56)           | Kansas (61)         | Kansas (46)         | Kansas (65)         | Kansas (66)         | Rhode Island (58)   |
| New York (53)       | New Jersey (56)     | Louisiana (1)       | Georgia (45)        | Wisconsin (64)      | Arizona (65)        | Washington (57)     |
| Colorado (52)       | Wisconsin (56)      | Washington (61)     | California (44)     | North Carolina (64) | Illinois (65)       | Delaware (57)       |
| Oregon (52)         | North Carolina (55) | Illinois (60)       | Connecticut (44)    | DC (63)             | Utah (64)           | Wisconsin (56)      |
| Utah (52)           | Iowa (52)           | Nebraska (60)       | Ohio (44)           | Nebraska (63)       | Delaware (64)       | New Hampshire (56)  |
| Georgia (51)        | Alaska (51)         | Colorado (59)       | Arkansas (44)       | Alaska (63)         | South Carolina (64) | Utah (55)           |
| DC (51)             | Utah (49)           | Arkansas (57)       | Michigan (43)       | Virginia (62)       | California (63)     | North Dakota (55)   |
| Alabama (51)        | Minnesota (46)      | Virginia (57)       | Utah (42)           | Arkansas (62)       | Virginia (61)       | DC (55)             |
| South Carolina (46) | Arkansas (46)       | Arizona (56)        | Vermont (42)        | New Jersey (61)     | Washington (61)     | Nevada (55)         |
| Rhode Island (46)   | Vermont (45)        | Wyoming (55)        | Virginia (42)       | Wyoming (60)        | Massachusetts (58)  | California (53)     |
| Ohio (38)           | Oklahoma (38)       | Iowa (54)           | Rhode Island (41)   | Utah (60)           | Vermont (56)        | Virginia (49)       |
| Idaho (35)          | North Dakota (35)   | Rhode Island (54)   | Colorado (41)       | Colorado (56)       | Maine (55)          | Maine (48)          |
| Vermont (26)        | Idaho (31)          | Minnesota (51)      | Alaska (31)         | South Dakota (53)   | Rhode Island (53)   | Hawaii (43)         |

**Table S10. Rankings and Scorings for the term ‘Hepatitis’ by State by year from 2011 to 2017.**

| 2011                | 2012                | 2013                | 2014                | 2015                | 2016                | 2017                |
|---------------------|---------------------|---------------------|---------------------|---------------------|---------------------|---------------------|
| West Virginia (100) | West Virginia (100) | West Virginia (100) | West Virginia (100) | West Virginia (100) | Hawaii (100)        | Michigan (100)      |
| Kentucky (93)       | New Hampshire (86)  | Hawaii (78)         | Kentucky (80)       | Kentucky (79)       | West Virginia (35)  | West Virginia (97)  |
| Tennessee (93)      | Mississippi (82)    | North Dakota (77)   | Tennessee (78)      | Tennessee (77)      | Kentucky (27)       | Kentucky (92)       |
| Mississippi (92)    | Kentucky (73)       | South Dakota (76)   | New Mexico (77)     | Arkansas (73)       | Virginia (27)       | Oklahoma (84)       |
| Arkansas (91)       | Tennessee (70)      | Vermont (73)        | Arkansas (73)       | Maine (71)          | Wyoming (25)        | South Dakota (84)   |
| Louisiana (87)      | Delaware (69)       | Mississippi (72)    | Mississippi (71)    | Alaska (70)         | North Dakota (25)   | California (82)     |
| South Dakota (87)   | DC (68)             | Kentucky (72)       | Alabama (71)        | Delaware (69)       | New Mexico (25)     | Alabama (81)        |
| Pennsylvania (86)   | Louisiana (68)      | Maryland (71)       | Delaware (70)       | South Carolina (69) | DC (24)             | Hawaii (79)         |
| North Dakota (86)   | Maryland (68)       | Montana (70)        | Oklahoma (70)       | Ohio (67)           | Tennessee (24)      | Tennessee (78)      |
| Oklahoma (84)       | Alabama (67)        | Indiana (68)        | Alaska (69)         | Maryland (66)       | Alabama (23)        | Mississippi (75)    |
| Maryland (83)       | Pennsylvania (66)   | Tennessee (68)      | Maryland (69)       | South Dakota (66)   | Louisiana (23)      | Pennsylvania (74)   |
| New Jersey (81)     | New Mexico (65)     | Florida (67)        | Louisiana (68)      | Alabama (66)        | Maryland (23)       | Nevada (74)         |
| Ohio (81)           | Arkansas (65)       | Louisiana (66)      | Vermont (67)        | Louisiana (66)      | Ohio (23)           | Indiana (73)        |
| Nebraska (81)       | Wyoming (65)        | Alaska (66)         | Florida (67)        | Missouri (66)       | Oklahoma (23)       | Ohio (72)           |
| Idaho (80)          | Missouri (65)       | New Mexico (65)     | Pennsylvania (66)   | Pennsylvania (65)   | Mississippi (23)    | Alaska (72)         |
| Hawaii (80)         | Alaska (64)         | North Carolina (65) | Indiana (66)        | Georgia (65)        | Alaska (22)         | Louisiana (71)      |
| Maine (78)          | Ohio (63)           | Kansas (65)         | Maine (66)          | DC (65)             | Pennsylvania (22)   | Arizona (71)        |
| Georgia (78)        | Idaho (63)          | Pennsylvania (65)   | DC (66)             | Mississippi (64)    | Missouri (22)       | New York (71)       |
| Alabama (77)        | Massachusetts (63)  | Oklahoma (65)       | Missouri (66)       | New Mexico (64)     | Arkansas (22)       | South Carolina (1)  |
| North Carolina (77) | South Dakota (63)   | Missouri (64)       | Iowa (66)           | Wyoming (64)        | Michigan (21)       | North Dakota (70)   |
| Connecticut (76)    | Florida (62)        | Ohio (64)           | Ohio (65)           | North Dakota (63)   | Georgia (21)        | Oregon (70)         |
| New York (76)       | Indiana (61)        | New Jersey (64)     | New Jersey (65)     | Oklahoma (62)       | Indiana (21)        | Arkansas (69)       |
| Rhode Island (75)   | Oklahoma (61)       | DC (63)             | Georgia (65)        | Florida (61)        | South Dakota (21)   | Missouri (69)       |
| New Hampshire (75)  | Georgia (61)        | Arkansas (63)       | North Dakota (64)   | Indiana (61)        | Delaware (21)       | New Jersey (68)     |
| Iowa (75)           | South Carolina (60) | Arizona (63)        | North Carolina (64) | New Jersey (61)     | Rhode Island (20)   | Maryland (68)       |
| Massachusetts (74)  | Maine (59)          | Maine (63)          | Montana (64)        | Michigan (59)       | New York (20)       | Connecticut (68)    |
| Delaware (74)       | North Carolina (58) | New York (63)       | Michigan (64)       | North Carolina (59) | Montana (20)        | Florida (68)        |
| Florida (74)        | Nebraska (58)       | Georgia (63)        | Rhode Island (63)   | Kansas (58)         | Florida (20)        | Idaho (67)          |
| Virginia (74)       | Nevada (58)         | Nevada (63)         | South Carolina (63) | Massachusetts (58)  | Maine (20)          | New Mexico (67)     |
| Missouri (74)       | Washington (57)     | Oregon (62)         | Massachusetts (63)  | New York (58)       | Wisconsin (20)      | DC (66)             |
| Nevada (73)         | New York (57)       | Washington (62)     | South Dakota (61)   | Connecticut (57)    | South Carolina (20) | Illinois (65)       |
| Alaska (72)         | Texas (57)          | Colorado (62)       | Minnesota (61)      | Montana (57)        | North Carolina (20) | North Carolina (65) |
| Indiana (72)        | New Jersey (56)     | New Hampshire (61)  | Texas (60)          | Texas (57)          | Arizona (19)        | Maine (64)          |
| Oregon (72)         | Arizona (56)        | California (61)     | Kansas (60)         | Utah (56)           | New Jersey (19)     | Minnesota (64)      |
| Montana (72)        | Kansas (56)         | Alabama (60)        | Arizona (59)        | California (56)     | Massachusetts (19)  | Georgia (64)        |
| Texas (71)          | Oregon (56)         | Connecticut (60)    | Connecticut (59)    | Washington (55)     | Oregon (19)         | Montana (64)        |
| New Mexico (71)     | Wisconsin (55)      | Iowa (60)           | Illinois (59)       | Idaho (54)          | Washington (19)     | Texas (63)          |
| Michigan (70)       | Virginia (55)       | Virginia (60)       | New York (58)       | Minnesota (54)      | Connecticut (19)    | Iowa (63)           |
| Wisconsin (70)      | Michigan (55)       | Idaho (60)          | Wisconsin (56)      | Iowa (54)           | Minnesota (18)      | Wyoming (63)        |
| Washington (69)     | Colorado (54)       | Rhode Island (59)   | Hawaii (55)         | Illinois (54)       | Kansas (18)         | Wisconsin (62)      |
| DC (68)             | North Dakota (54)   | Michigan (58)       | Washington (54)     | Hawaii (54)         | Iowa (18)           | Virginia (62)       |
| California (67)     | Connecticut (54)    | Wisconsin (58)      | California (54)     | Nebraska (54)       | Nebraska (18)       | New Hampshire (61)  |
| Utah (66)           | Illinois (53)       | Minnesota (58)      | Virginia (53)       | Nevada (53)         | Texas (18)          | Massachusetts (61)  |
| Minnesota (66)      | Minnesota (53)      | Texas (58)          | Colorado (52)       | New Hampshire (52)  | Utah (18)           | Kansas (60)         |
| Kansas (66)         | Iowa (53)           | South Carolina (58) | Nevada (52)         | Arizona (52)        | Nevada (18)         | Utah (60)           |
| Arizona (65)        | California (52)     | Utah (55)           | Idaho (50)          | Wisconsin (52)      | Illinois (18)       | Delaware (60)       |
| Illinois (64)       | Montana (52)        | Wyoming (55)        | New Hampshire (50)  | Rhode Island (51)   | California (17)     | Vermont (59)        |
| South Carolina (63) | Rhode Island (51)   | Illinois (55)       | Nebraska (48)       | Oregon (49)         | Colorado (17)       | Rhode Island (58)   |
| Colorado (57)       | Vermont (49)        | Massachusetts (54)  | Utah (47)           | Vermont (48)        | New Hampshire (17)  | Washington (57)     |
| Vermont (57)        | Hawaii (48)         | Nebraska (49)       | Wyoming (45)        | Colorado (48)       | Idaho (16)          | Colorado (57)       |
| Wyoming (53)        | Utah (46)           | Delaware (48)       | Oregon (44)         | Virginia (48)       | Vermont (16)        | Nebraska (55)       |
